# Supplementary material
Source: MDPI journal article supplement (https://www.mdpi.com/2072-4292/8/11/883)

correlation: 0.93

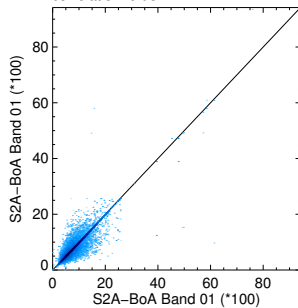

correlation: 0.84

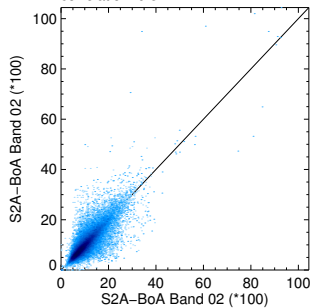

correlation: 0.84

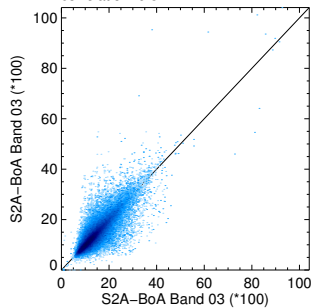

correlation: 0.85

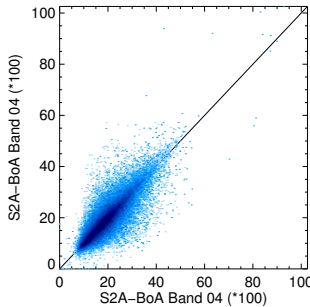

correlation: 0.92

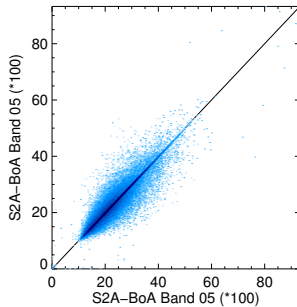

correlation: 0.91

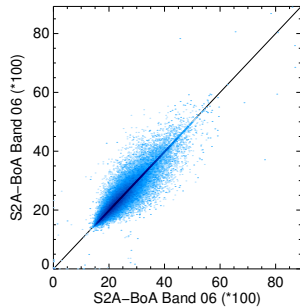

correlation: 0.92

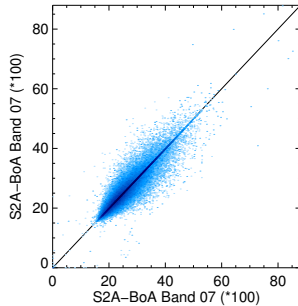

correlation: 0.93

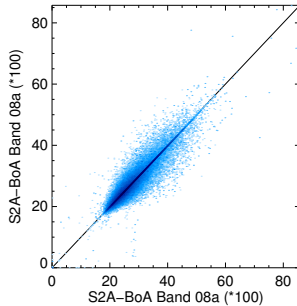

correlation: 0.93

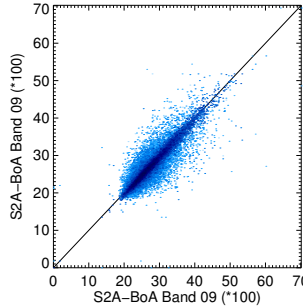

correlation: 0.95

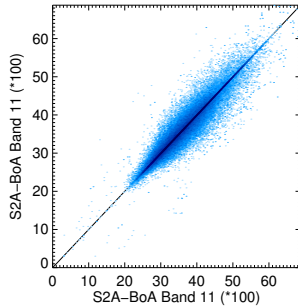

correlation: 0.95

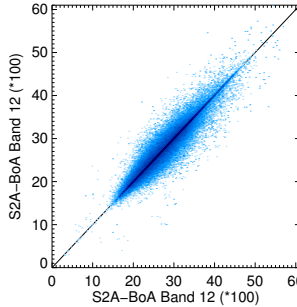

Supplement: s1 [file s1]
