# Supplementary material
Source: MDPI journal article supplement (https://www.mdpi.com/2072-4292/8/11/883)

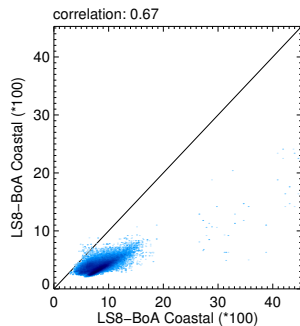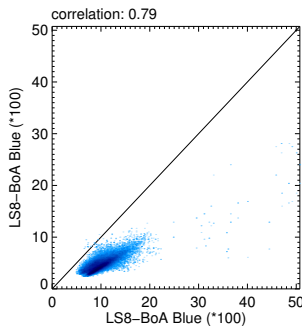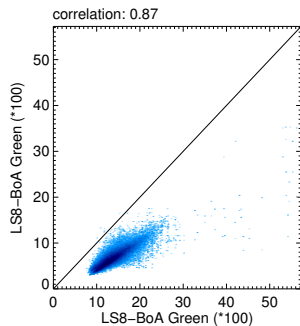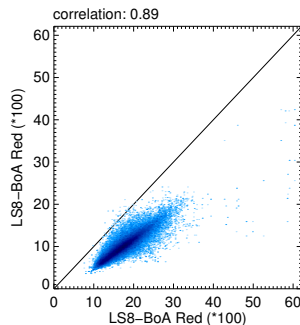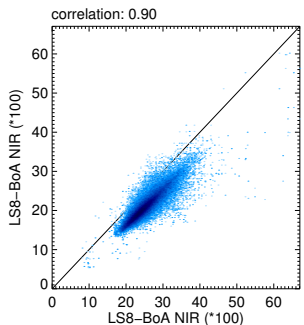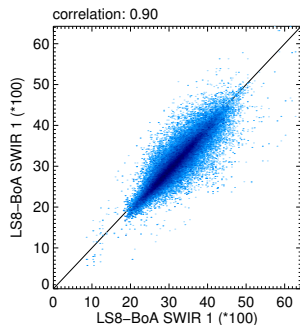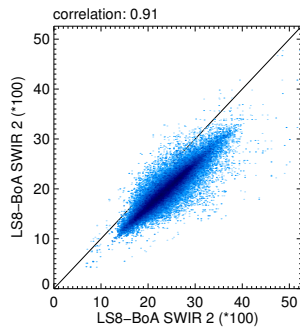

Supplement: s1 [file s1]

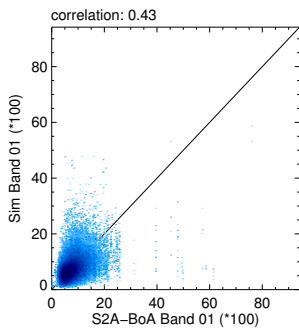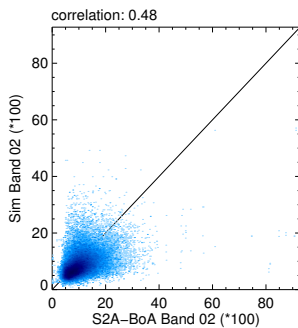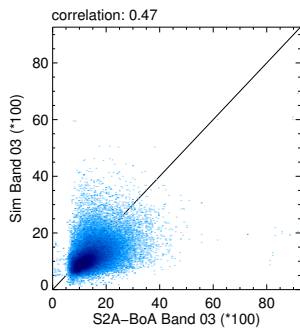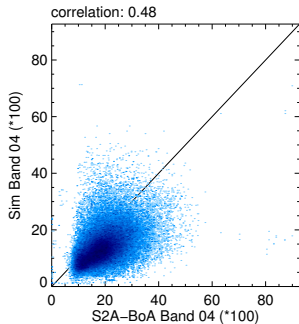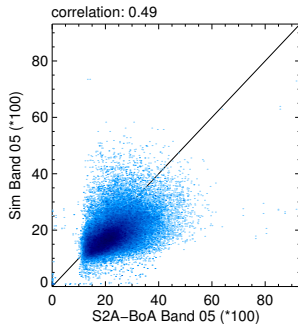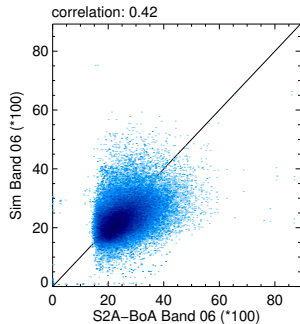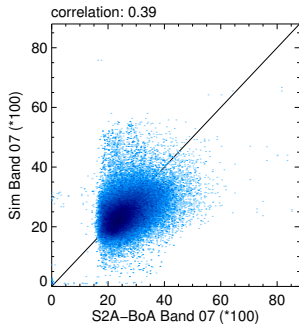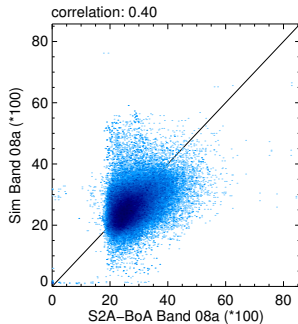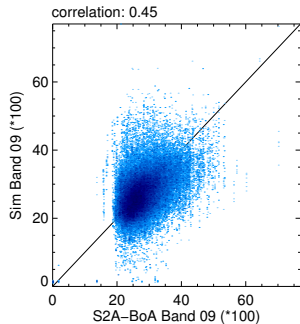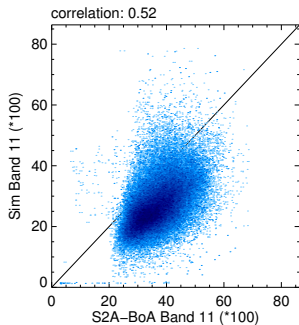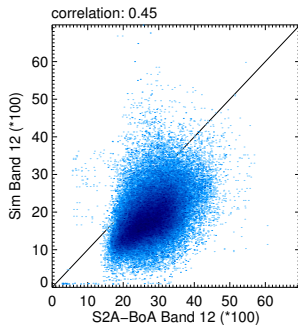

Supplement: s1 [file s1]

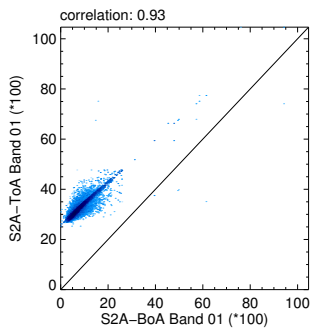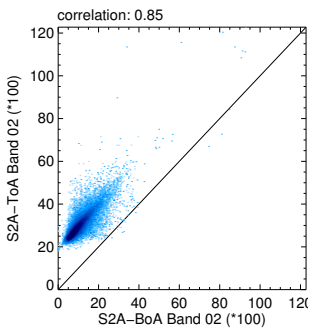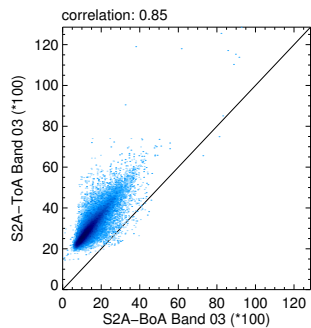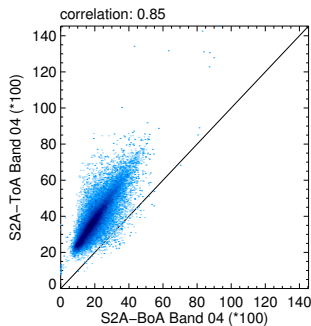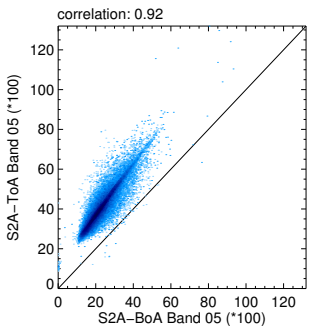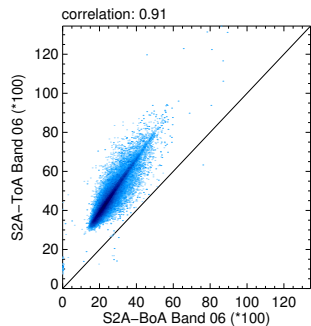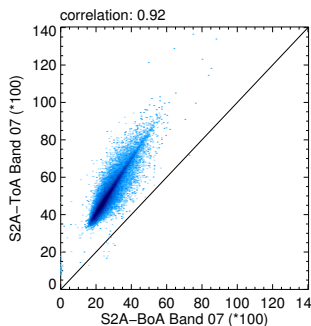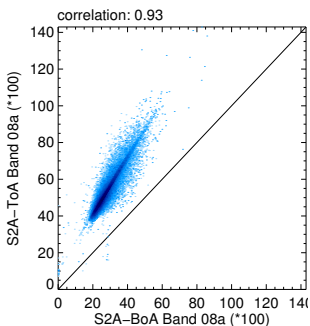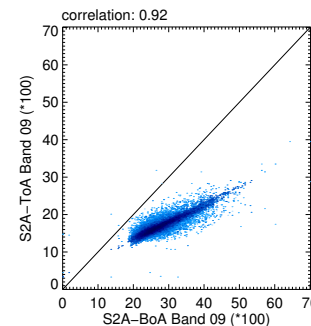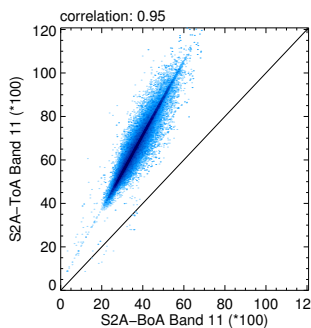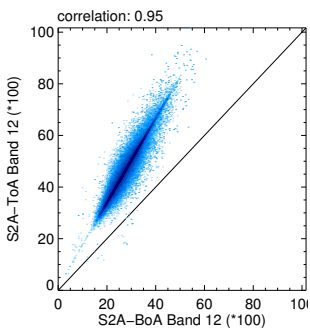

Supplement: s1 [file s1]

correlation: 0.67

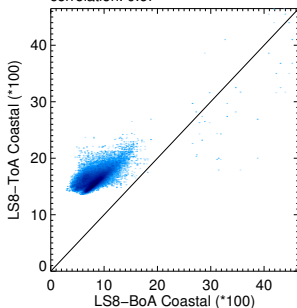

correlation: 0.79

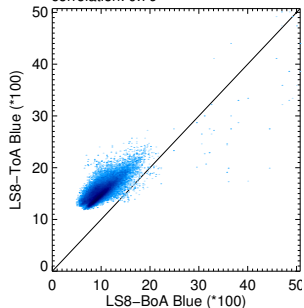

correlation: 0.87

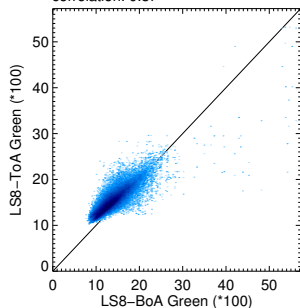

correlation: 0.89

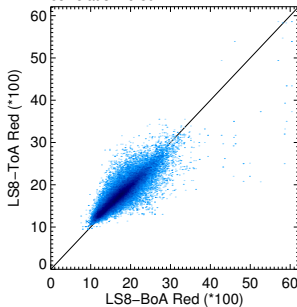

correlation: 0.90

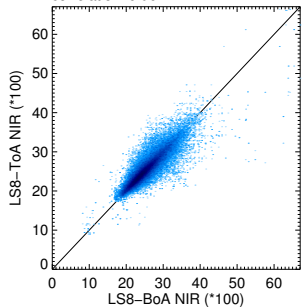

correlation: 0.90

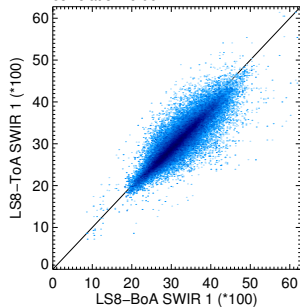

correlation: 0.91

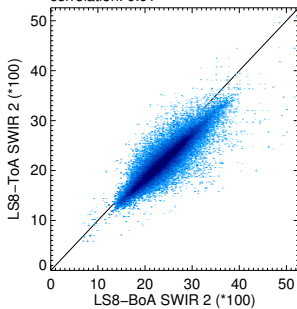

Supplement: s1 [file s1]

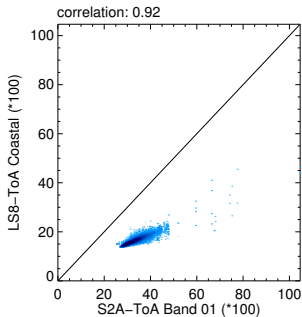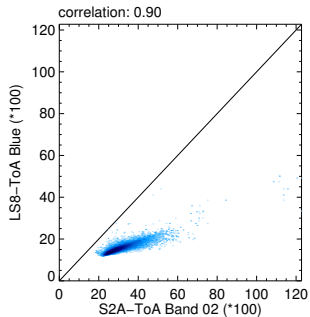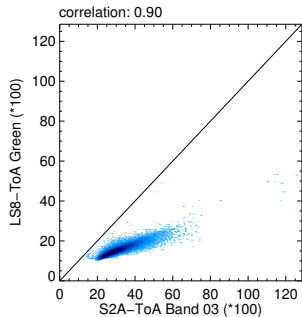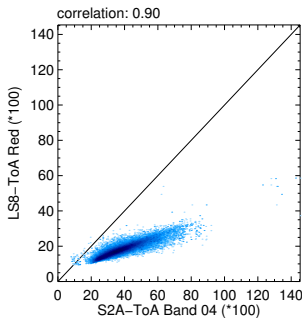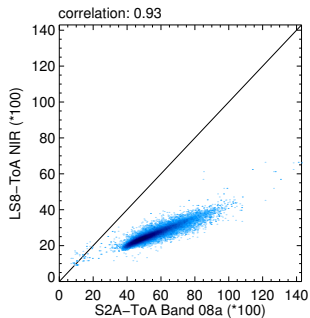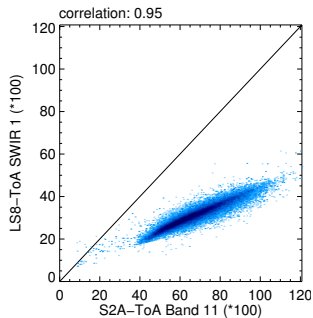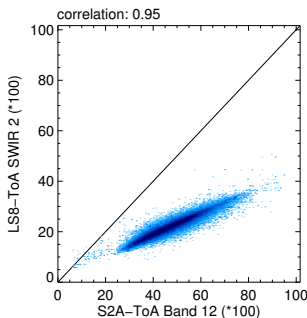

Supplement: s1 [file s1]

correlation: 0.70

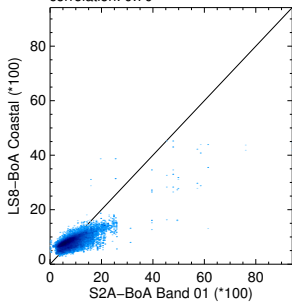

correlation: 0.79

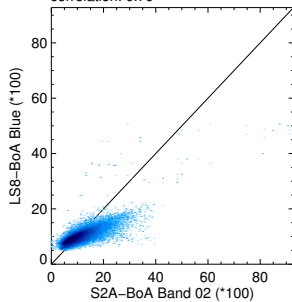

correlation: 0.85

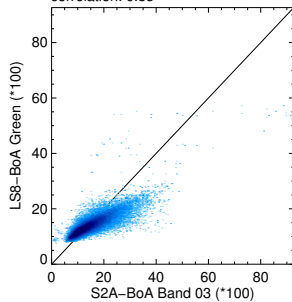

correlation: 0.87

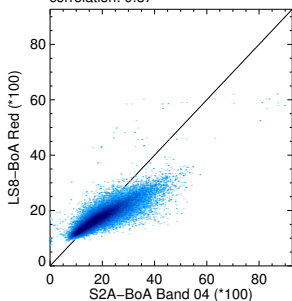

correlation: 0.90

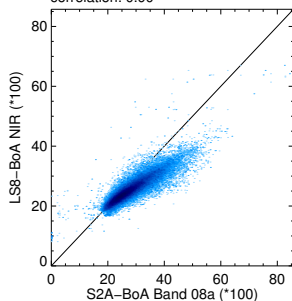

correlation: 0.93

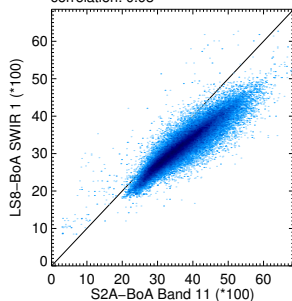

correlation: 0.93

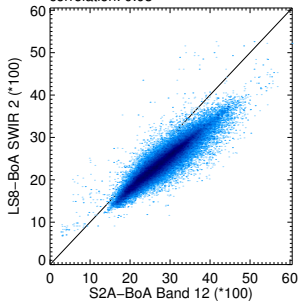

Supplement: s1 [file s1]
